# Supplementary material for: Comparative genomics of the plant-growth promoting bacterium Sphingobium sp. strain AEW4 isolated from the rhizosphere of the beachgrass Ammophila breviligulata
Source: PubMed Central journal article supplement (PMC9281055; doi:10.1186/s12864-022-08738-8), 2022-07-13

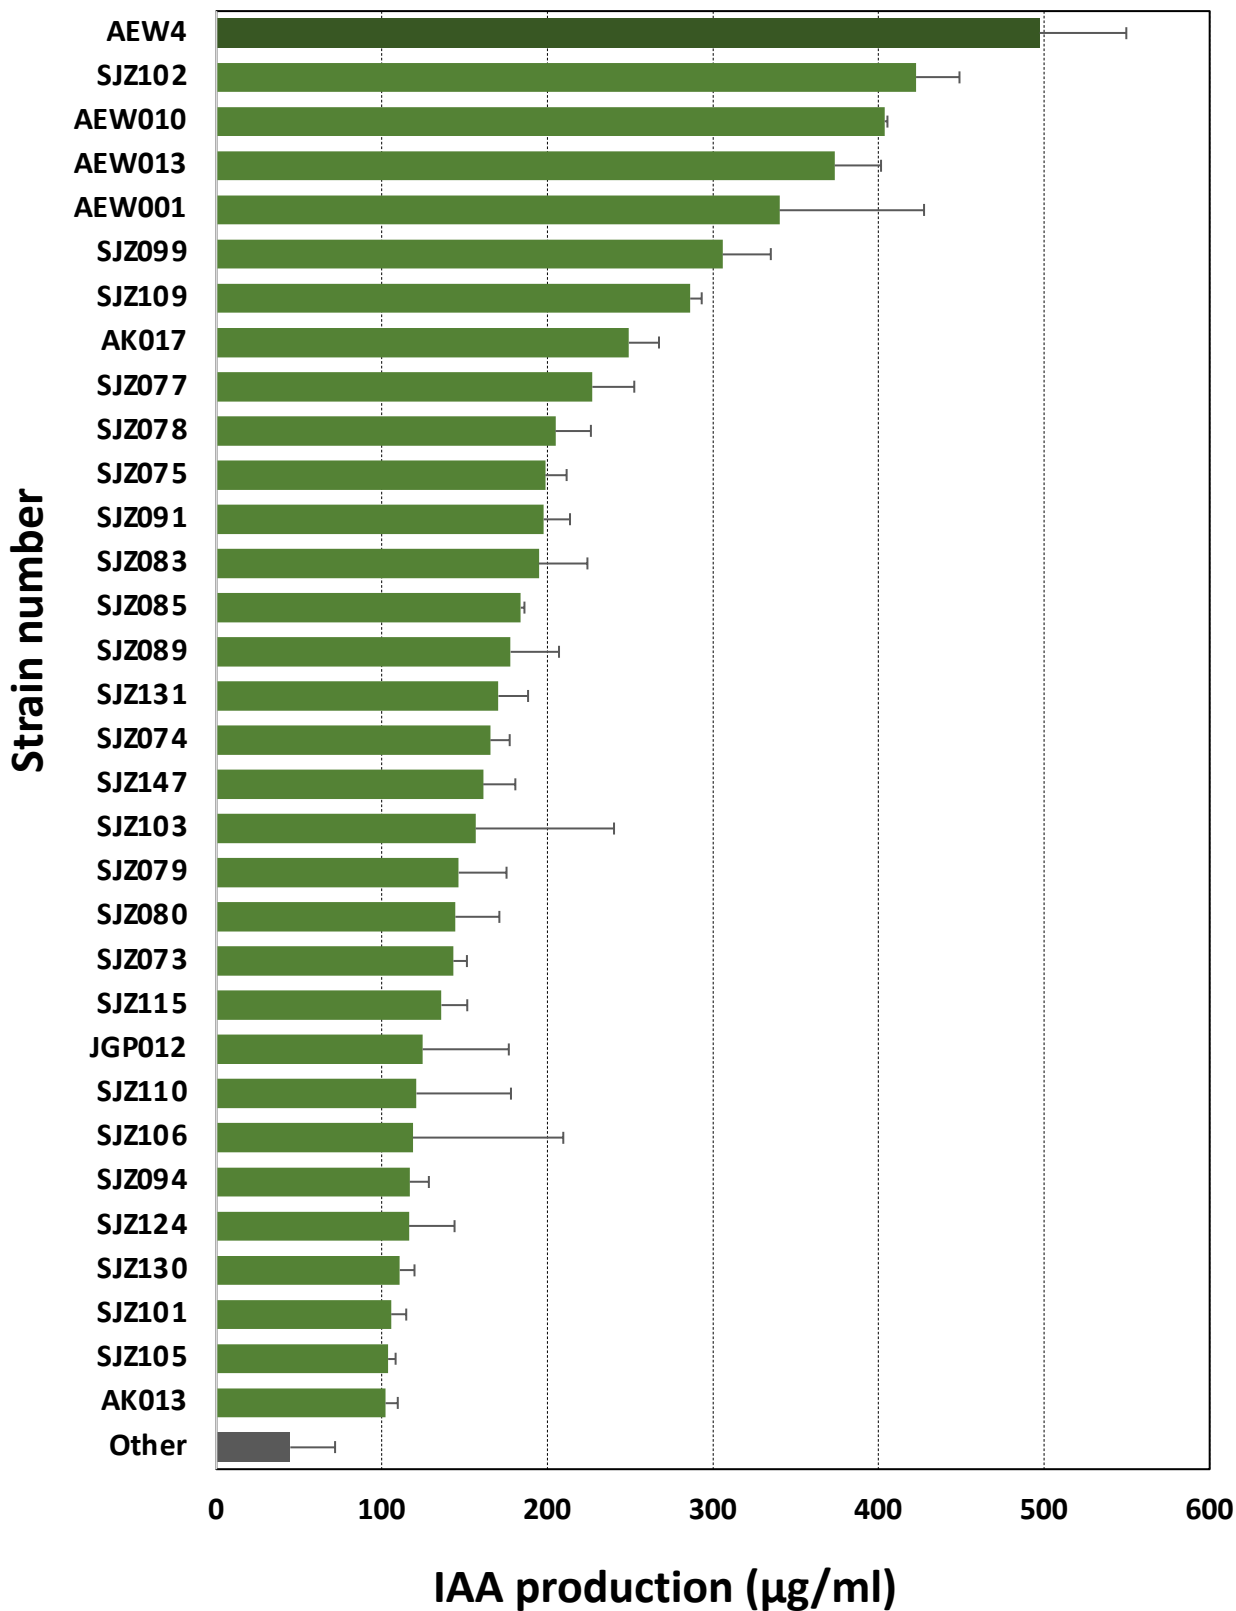

Supplement: 12864_2022_8738_MOESM1_ESM.pdf [file 12864_2022_8738_MOESM1_ESM.pdf]
